# Supplementary material for: SNooPer: a machine learning-based method for somatic variant identification from low-pass next-generation sequencing
Source: PubMed Central journal article supplement (PMC5109690; doi:10.1186/s12864-016-3281-2), 2016-11-14
Supplement: 12864_2016_3281_MOESM1_ESM.pdf [file 12864_2016_3281_MOESM1_ESM.pdf]

**Additional File 1 (S1 Table). List of SNooPer's features and descriptions.**

| Group                                    | Feature                 | Description                                                                                                                                                                                                            | IG (model 1A) |
|------------------------------------------|-------------------------|------------------------------------------------------------------------------------------------------------------------------------------------------------------------------------------------------------------------|---------------|
| <b>Coverage and VAF</b>                  | allelic_freq_highqual   | High quality VAF (BQV > 20, MQV > 10)                                                                                                                                                                                  | 0.04187       |
|                                          | highqualcoverage_vs_med | Number of high quality reads (MQV >10) supporting the alternative bases normalized by the median value                                                                                                                 | 0.00940       |
| <b>Location along the read</b>           | LocMean_vs_med          | Mean location of alternative bases on the reads normalized by the median value                                                                                                                                         | 0.00130       |
|                                          | LocMean_vs_ref          | Ratio of the mean location of alternative bases on the reads over the mean location of reference bases on the reads                                                                                                    | 0.00000       |
| <b>Quality bias of alternative bases</b> | GQBprob                 | Wilcoxon rank-sum test comparing BQVs of reference and alternative bases (p-value)                                                                                                                                     | 0.01423       |
|                                          | var_mean_mqv_quality    | Mean MQV of alternative bases (Phred score)                                                                                                                                                                            | 0.01210       |
|                                          | var_mean_bqv_quality    | Mean BQV of alternative bases (Phred score)                                                                                                                                                                            | 0.00883       |
|                                          | QBpval                  | Fisher's exact test comparing the number of reference and alternative bases matching the quality criteria (p-value)                                                                                                    | 0.00852       |
|                                          | RQBprob                 | Wilcoxon rank-sum test comparing MQVs of reference and alternative bases (p-value)                                                                                                                                     | 0.00641       |
|                                          | bqv_ratio_vs_med        | Ratio of mean BQV of alternative bases over mean BQV of reference bases normalized by the median value                                                                                                                 | 0.00559       |
| <b>Strand bias</b>                       | mqv_ratio_vs_med        | Ratio of mean MQV of alternative bases over mean MQV of reference bases normalized by the median value                                                                                                                 | 0.00156       |
|                                          | SBpbinom                | Probability of having n reads on the less represented strand for a coverage of N knowing that each reads has a probability of 0.5 to be aligned on each strand (cumulative probability from the Binomial distribution) | 0.00224       |
|                                          | FRratio                 | Ratio of the number of reads supporting the alternative bases over the number of reads supporting the reference bases                                                                                                  | 0.00221       |
|                                          | SBpval                  | Fisher's exact test comparing the repartition of reference and alternative bases on positive and negative strands (p-value)                                                                                            | 0.00103       |
| <b>Other</b>                             | indelflag*              | Flag indicating the presence of indels aligned at the considered position                                                                                                                                              | 0.00000       |

As an example, the information gain (IG) of each feature was measured with respect to the class (InfoGainAttributeEval method, Weka suite) for Model 1A and is indicated in the last column of the table. Features presenting the suffix "vs\_med" were normalized using a median value calculated from variants randomly extracted from mpileups files. Features presenting the suffix "vs\_ref" were evaluated with respect to reference bases at the same position. (\*) Available feature but not used to construct SNooPer's Model 1A.
