# Supplementary material for: SNooPer: a machine learning-based method for somatic variant identification from low-pass next-generation sequencing
Source: PubMed Central journal article supplement (PMC5109690; doi:10.1186/s12864-016-3281-2), 2016-11-14
Supplement: 12864_2016_3281_MOESM3_ESM.pdf [file 12864_2016_3281_MOESM3_ESM.pdf]

**A**

=== Stratified cross-validation ===

|                                  |                   |
|----------------------------------|-------------------|
| Correctly Classified Instances   | 30175 (99.7521 %) |
| Incorrectly Classified Instances | 75 (0.2479 %)     |
| Kappa statistic                  | 0.8395            |
| Mean absolute error              | 0.0041            |
| Root mean squared error          | 0.0429            |
| Relative absolute error          | 24.9469 %         |
| Root relative squared error      | 47.4204 %         |
| Total Number of Instances        | 30250             |

=== Confusion Matrix ===

|       | a   | b | <-- classified as |
|-------|-----|---|-------------------|
| 29977 | 23  |   | a = 0             |
| 52    | 198 |   | b = 1             |

**B**

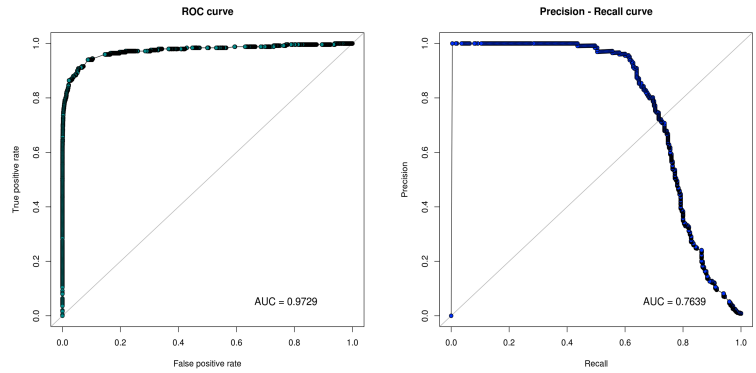

**Additional File 3 (S1 Fig). Snapshot of a SNooPer output from the training phase. (A)** General statistics including Kappa statistics (top) and the confusion matrix (bottom) obtained from a 10-fold cross validation training phase. **(B)** Receiver operating characteristics (left) and precision-recall (right) curves and the related AUCs calculated during the training phase.
